# Supplementary material for: Global patterns in genomic diversity underpinning the evolution of insecticide resistance in the aphid crop pest Myzuspersicae
Source: PubMed Central journal article supplement (PMC8263593; doi:10.1038/s42003-021-02373-x), 2021-07-07
Supplement: 42003_2021_2373_MOESM7_ESM.pdf [file 42003_2021_2373_MOESM7_ESM.pdf]

## Reporting Summary

Nature Research wishes to improve the reproducibility of the work that we publish. This form provides structure for consistency and transparency in reporting. For further information on Nature Research policies, see our [Editorial Policies](#) and the [Editorial Policy Checklist](#).

### Statistics

For all statistical analyses, confirm that the following items are present in the figure legend, table legend, main text, or Methods section.

n/a Confirmed

- The exact sample size ( $n$ ) for each experimental group/condition, given as a discrete number and unit of measurement
- A statement on whether measurements were taken from distinct samples or whether the same sample was measured repeatedly
- The statistical test(s) used AND whether they are one- or two-sided  
*Only common tests should be described solely by name; describe more complex techniques in the Methods section.*
- A description of all covariates tested
- A description of any assumptions or corrections, such as tests of normality and adjustment for multiple comparisons
- A full description of the statistical parameters including central tendency (e.g. means) or other basic estimates (e.g. regression coefficient) AND variation (e.g. standard deviation) or associated estimates of uncertainty (e.g. confidence intervals)
- For null hypothesis testing, the test statistic (e.g.  $F$ ,  $t$ ,  $r$ ) with confidence intervals, effect sizes, degrees of freedom and  $P$  value noted  
*Give  $P$  values as exact values whenever suitable.*
- For Bayesian analysis, information on the choice of priors and Markov chain Monte Carlo settings
- For hierarchical and complex designs, identification of the appropriate level for tests and full reporting of outcomes
- Estimates of effect sizes (e.g. Cohen's  $d$ , Pearson's  $r$ ), indicating how they were calculated

*Our web collection on [statistics for biologists](#) contains articles on many of the points above.*

### Software and code

Policy information about [availability of computer code](#)

Data collection

Data analysis

For manuscripts utilizing custom algorithms or software that are central to the research but not yet described in published literature, software must be made available to editors and reviewers. We strongly encourage code deposition in a community repository (e.g. GitHub). See the Nature Research [guidelines for submitting code & software](#) for further information.

### Data

Policy information about [availability of data](#)

All manuscripts must include a [data availability statement](#). This statement should provide the following information, where applicable:

- Accession codes, unique identifiers, or web links for publicly available datasets
- A list of figures that have associated raw data
- A description of any restrictions on data availability

The sequence data generated in this study has been deposited with NCBI under the Bio Project ID: PRJNA574571. For individual accession numbers associated with each clone see Supplementary Data 1. The genome assembly of *M. persicae* clone G006 is also available at AphidBase <https://bipaa.genouest.org/is/aphidbase/>.

## Field-specific reporting

Please select the one below that is the best fit for your research. If you are not sure, read the appropriate sections before making your selection.

Life sciences       Behavioural & social sciences       Ecological, evolutionary & environmental sciences

For a reference copy of the document with all sections, see [nature.com/documents/nr-reporting-summary-flat.pdf](https://www.nature.com/documents/nr-reporting-summary-flat.pdf)

## Ecological, evolutionary & environmental sciences study design

All studies must disclose on these points even when the disclosure is negative.

|                                   |                                                                                                                                                                                                                                                                                                                                                                                                                                                                                                                                                                                                                                                                     |
|-----------------------------------|---------------------------------------------------------------------------------------------------------------------------------------------------------------------------------------------------------------------------------------------------------------------------------------------------------------------------------------------------------------------------------------------------------------------------------------------------------------------------------------------------------------------------------------------------------------------------------------------------------------------------------------------------------------------|
| Study description                 | The aphid <i>Myzus persicae</i> is a destructive agricultural pest that displays an exceptional ability to develop resistance to both natural and synthetic insecticides. In this study we generated a population genomic resource for <i>M. persicae</i> comprising a high-quality chromosomal-scale genome assembly together with resequenced genomes of 127 clonal aphid lines collected from all continents where crops are grown. We used this data to investigate the mechanisms underpinning insecticide resistance, and ecological and evolutionary factors influencing its emergence and spread.                                                           |
| Research sample                   | The research sample comprised 127 clones (female asexual lineages) of <i>Myzus persicae</i> s.l. derived from 19 countries covering all continents except Antarctica (see Supplementary Table 2 of the manuscript for full details on the clone library). The clones were collected from 14 host plants encompassing a range of agriculturally important crops. Of the assembled clones, ~110 are maintained as asexual lineages in the Bass laboratory. These are available to other researchers as live cultures or preserved material. All clones were sequenced using Illumina paired-end sequencing to an average coverage of 40X (see Supplementary Table 2). |
| Sampling strategy                 | Samples were collected from the laboratories of the co-authors and was thus opportunistic. However, our aim was to sample as geographically widely as possible and from a range of agriculturally important host plants. Any sampling limitations in regards to specific host plants are fully acknowledged in the manuscript during discussion of the results.                                                                                                                                                                                                                                                                                                     |
| Data collection                   | All clones were sequenced using Illumina paired-end sequencing to an average coverage of 40X (see Supplementary Table 2) and data was collected and held by the laboratory of the corresponding author and distributed to co-authors as required. All other data was collected in the laboratory of the corresponding author.                                                                                                                                                                                                                                                                                                                                       |
| Timing and spatial scale          | Data was collected from 2015-2020 by the laboratory of the corresponding author.                                                                                                                                                                                                                                                                                                                                                                                                                                                                                                                                                                                    |
| Data exclusions                   | No data was excluded from any analyses                                                                                                                                                                                                                                                                                                                                                                                                                                                                                                                                                                                                                              |
| Reproducibility                   | All attempts to repeat experiments described in this study were successful.                                                                                                                                                                                                                                                                                                                                                                                                                                                                                                                                                                                         |
| Randomization                     | Not applicable to this study                                                                                                                                                                                                                                                                                                                                                                                                                                                                                                                                                                                                                                        |
| Blinding                          | Not applicable to this study                                                                                                                                                                                                                                                                                                                                                                                                                                                                                                                                                                                                                                        |
| Did the study involve field work? | <input type="checkbox"/> Yes <input checked="" type="checkbox"/> No                                                                                                                                                                                                                                                                                                                                                                                                                                                                                                                                                                                                 |

## Reporting for specific materials, systems and methods

We require information from authors about some types of materials, experimental systems and methods used in many studies. Here, indicate whether each material, system or method listed is relevant to your study. If you are not sure if a list item applies to your research, read the appropriate section before selecting a response.

### Materials & experimental systems

| n/a                                 | Involved in the study                                           |
|-------------------------------------|-----------------------------------------------------------------|
| <input checked="" type="checkbox"/> | <input type="checkbox"/> Antibodies                             |
| <input checked="" type="checkbox"/> | <input type="checkbox"/> Eukaryotic cell lines                  |
| <input checked="" type="checkbox"/> | <input type="checkbox"/> Palaeontology and archaeology          |
| <input type="checkbox"/>            | <input checked="" type="checkbox"/> Animals and other organisms |
| <input checked="" type="checkbox"/> | <input type="checkbox"/> Human research participants            |
| <input checked="" type="checkbox"/> | <input type="checkbox"/> Clinical data                          |
| <input checked="" type="checkbox"/> | <input type="checkbox"/> Dual use research of concern           |

### Methods

| n/a                                 | Involved in the study                           |
|-------------------------------------|-------------------------------------------------|
| <input checked="" type="checkbox"/> | <input type="checkbox"/> ChIP-seq               |
| <input checked="" type="checkbox"/> | <input type="checkbox"/> Flow cytometry         |
| <input checked="" type="checkbox"/> | <input type="checkbox"/> MRI-based neuroimaging |

## Animals and other organisms

Policy information about [studies involving animals](#); [ARRIVE guidelines](#) recommended for reporting animal research

|                    |                                                                                               |
|--------------------|-----------------------------------------------------------------------------------------------|
| Laboratory animals | <i>Myzus persicae</i> is a lower invertebrate and is not classified as a 'Laboratory animal'. |
|--------------------|-----------------------------------------------------------------------------------------------|

Wild animals

Study did not involve wild animals

Field-collected samples

Study did not involve samples collected directly from the field

Ethics oversight

Myzus persicae is a lower invertebrate and thus study of this species have no ethical requirements.

Note that full information on the approval of the study protocol must also be provided in the manuscript.
